# Supplementary figures and images for: CD_99 G1 neutrophils modulate osteogenic differentiation of mesenchymal stem cells in the pathological process of ankylosing spondylitis
Source: HighWire-hosted journal article supplement (doi:10.1136/ard-2023-224107), 2023-11-17

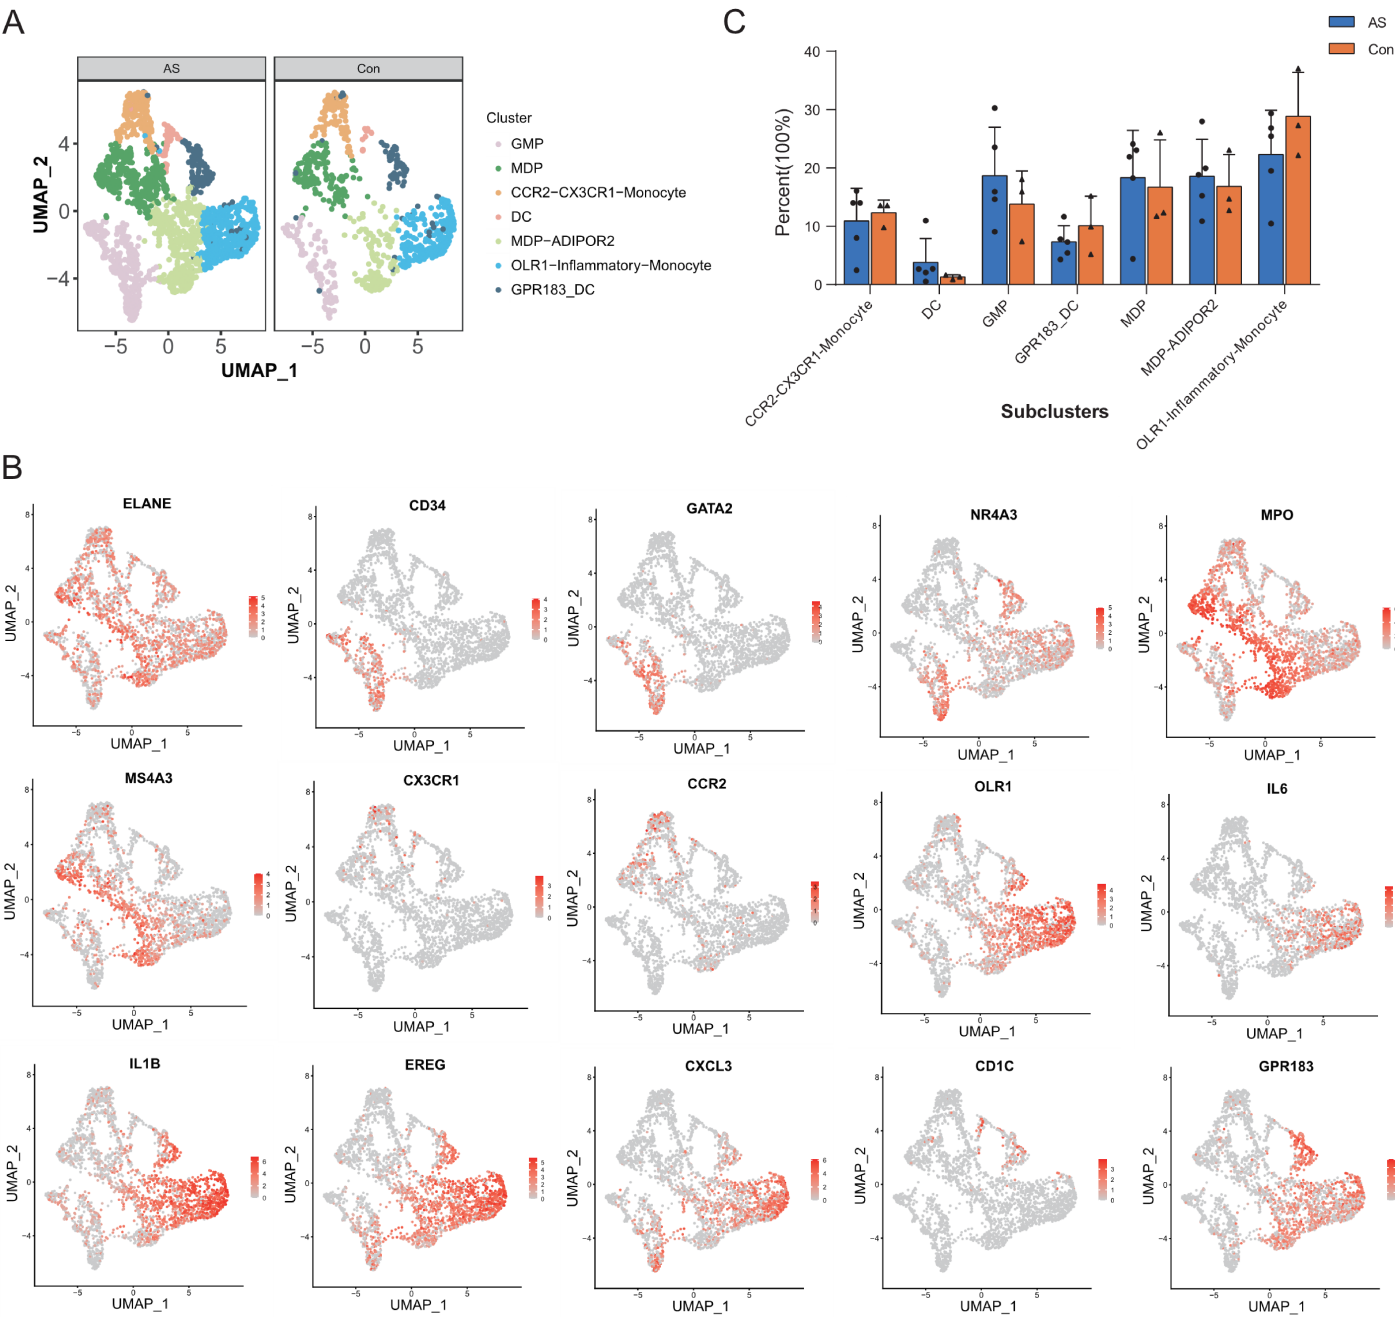

Supplement: ard-2023-224107supp016_data_supplement.pdf [file ard-2023-224107supp016_data_supplement.pdf]
